# Supplementary material for: Insights into the κ/ι-carrageenan metabolism pathway of some marine Pseudoalteromonas species
Source: PubMed Central journal article supplement (PMC6923384; doi:10.1038/s42003-019-0721-y), 2019-12-19
Supplement: 42003_2019_721_MOESM2_ESM.pdf [file 42003_2019_721_MOESM2_ESM.pdf]

## Description of Additional Supplementary Files

**File Name:** Supplementary Data 1

**Description:** This table contains the results of the RNAseq experiment.
